# Supplementary material
Source: Springer Nature journal article supplement (https://www.springermedizin.de/resource/supplementary/12979_2007_43_MOESM5_ESM.pdf/9603250)

**Percent (%)  
CD8+ T Cell  
Transmigration**

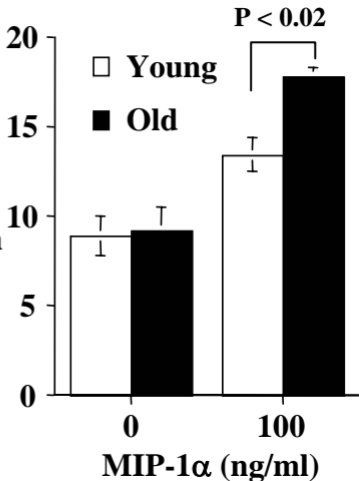

Supplement: MOESM5 [file 9603250]
